1 **Comparative genomics of *Mycoplasma feriruminatoris*, a fast-growing**  
2 **pathogen of wild *Caprinae***

3

4 Vincent Baby<sup>1</sup>, Chloé Ambroset<sup>2</sup>, Patrice Gaurivaud<sup>2</sup>, Laurent Falquet<sup>3</sup>, Christophe Boury<sup>4</sup>,  
5 Erwan Guichoux<sup>4</sup>, Joerg Jores<sup>5</sup>, Carole Lartigue<sup>1</sup>, Florence Tardy<sup>2 †</sup>, Pascal Sirand-Pugnet<sup>1 †</sup>

6

7 <sup>1</sup> Univ. Bordeaux, INRAE, UMR BFP, F-33882, Villenave d’Ornon, France

8 <sup>2</sup> Université de Lyon, Anses–Laboratoire de Lyon, VetAgro Sup, UMR Mycoplasmoses animales, 69007  
9 Lyon, France

10 <sup>3</sup> Department of Biology, University of Fribourg and Swiss Institute of Bioinformatics, CH-1700 Fribourg,  
11 Switzerland

12 <sup>4</sup> Université de Bordeaux, INRAE, BIOGECO, 33610 Cestas, France

13 <sup>5</sup> Institute of Veterinary Bacteriology, Vetsuisse Faculty, University of Bern, CH-3001 Bern, Switzerland

14 † These authors contributed equally to this work.

15

16 Corresponding authors:

17 **Pascal Sirand-Pugnet**

18 Address: Université de Bordeaux, INRAE, UMR BFP, 71 avenue Edouard Bourlaux, 33140 Villenave  
19 d’Ornon, France

20 Phone: (+33) 557122359

21 Email: [pascal.sirand-pugnet@inrae.fr](mailto:pascal.sirand-pugnet@inrae.fr)

22 **Florence Tardy**

23 Address: Anses–Laboratoire de Lyon, VetAgro Sup, UMR Mycoplasmoses animales, 31 avenue Tony  
24 Garnier, 69007 Lyon, France

25 Phone (+33) 478696843

26 Email: [florence.tardy@anses.fr](mailto:florence.tardy@anses.fr)

27

28 ORCID identifier: Vincent Baby ([0000-0002-4938-1487](https://orcid.org/0000-0002-4938-1487)), Chloé Ambroset ([0000-0003-0558-6445](https://orcid.org/0000-0003-0558-6445)), Patrice  
29 Gaurivaud ([0000-0002-8390-8123](https://orcid.org/0000-0002-8390-8123)), Laurent Falquet ([0000-0001-8102-7579](https://orcid.org/0000-0001-8102-7579)), Erwan Guichoux ([0000-0002-](https://orcid.org/0000-0002-)

30 [3686-8800](#)), Joerg Jores ([0000-0003-3790-5746](#)), Carole Lartigue ([0000-0001-5550-7579](#)), Florence Tardy  
31 ([0000-0003-3968-4801](#)) and Pascal Sirand-Pugnet ([0000-0003-2613-0762](#)).

32

33 Running title: Comparative genomics of *Mycoplasma feriruminatoris*

34

## 35 **Abstract:**

36 *Mycoplasma feriruminatoris* is a fast-growing *Mycoplasma* species isolated from wild *Caprinae*  
37 and first described in 2013. *M. feriruminatoris* isolates have been associated with arthritis,  
38 keratoconjunctivitis, pneumonia and septicemia, but were also recovered from apparently  
39 healthy animals. To better understand what defines this species, we performed a genomic survey  
40 on 14 strains collected from free-ranging or zoo-housed animals between 1987 and 2017. The  
41 average chromosome size of the *M. feriruminatoris* strains was  $1,040 \pm 0,024$  kbp, with 24% G+C  
42 and  $852 \pm 31$  CDS. The core genome and pan-genome of the *M. feriruminatoris* species contained  
43 628 and 1,312 protein families, respectively. The *M. feriruminatoris* strains displayed a relatively  
44 closed pan-genome, with many features and putative virulence factors shared with species from  
45 the *M. mycoides* cluster, including the MIB-MIP Ig cleavage system, a repertoire of DUF285  
46 surface proteins and a complete biosynthetic pathway for galactan. *M. feriruminatoris* genomes  
47 were found to be mostly syntenic, although repertoires of mobile genetic elements, including  
48 Mycoplasma Integrative and Conjugative Elements, insertion sequences, and a single plasmid  
49 varied. Phylogenetic- and gene content analyzes confirmed that *M. feriruminatoris* was closer to  
50 the *M. mycoides* cluster than to the ruminant species *M. yeatsii* and *M. putrefaciens*. Ancestral  
51 genome reconstruction showed that the emergence of the *M. feriruminatoris* species was

52 associated with the gain of 17 gene families, some of which encode defense enzymes and surface  
53 proteins, and the loss of 25 others, some of which are involved in sugar transport and metabolism.  
54 This comparative study suggests that the *M. mycoides* cluster could be extended to include *M.*  
55 *feriruminatoris*. We also find evidence that the specific organization and structure of the DnaA  
56 boxes around the *oriC* of *M. feriruminatoris* may contribute to drive the remarkable fast growth  
57 of this minimal bacterium.

58  
59 **Keywords:** *Mycoplasma*, ruminant pathogen, mobile elements, virulence factors, *M. mycoides*  
60 cluster, polysaccharide synthesis, *oriC*

61

## 62 Introduction

63 Within the prokaryotes, the class *Mollicutes* gathers bacteria characterized by their  
64 inability to synthesize peptidoglycan or the precursors necessary to build cell walls. They are  
65 consequently Gram-stain-negative, despite having evolved from Gram-positive bacteria, of which  
66 they constitute a distinct phylogenetic lineage. The class *Mollicutes* includes 11 genera (Brown et  
67 al., 2018), among which the *Mycoplasma* genus gathers the largest number of pathogenic or  
68 opportunistic species (n=78) and continues to grow as new species are regularly described in  
69 various hosts. Six new *Mycoplasma* species were described in the year 2022 alone (Noll et al.,  
70 2022; Spergser et al., 2022; Volokhov et al., 2022). *Mycoplasma* spp. genomes are small, with  
71 length varying from 580 to 1,350 kbp, resulting in very limited metabolic pathways and thus

72 fastidious growth that generally requires sterols and complex media. Their generation time varies  
73 widely but can exceed several hours for certain species. Their G+C content is low, varying from  
74 23% for *Mycoplasma capricolum* subsp. *capricolum* to 40% for *M. pneumoniae*. They also share a  
75 specific pattern of codon usage with UGA encoding tryptophan.

76 The *Mycoplasma* genus is polyphyletic and can be divided into 3 distinct groups, i.e. the  
77 two clades Hominis and Pneumoniae, and a third one known as the clade Spiroplasma. This last  
78 one includes the '*M. mycoides* cluster' that contains the type species of the genus despite its  
79 eccentric phylogenetic position (Brown et al., 2018). The *M. mycoides* cluster evolved from insect-  
80 associated Mollicutes (*Spiroplasma*, *Entomoplasma* and *Mesoplasma*) to become ruminant  
81 pathogens capable of non-vectorized direct transmission (Gasparich et al., 2004). This evolution  
82 resulted from a combination of gene losses and more than 100 novel genes gained through  
83 horizontal gene transfer from donors potentially belonging to the Hominis/Pneumoniae lineages  
84 (Lo et al., 2018). In particular, massive genetic exchanges have been predicted with the ruminant  
85 pathogen *M. agalactiae* from the Hominis clade (Sirand-Pugnet et al., 2007). Lo et al. (2018)  
86 considered species of the *M. mycoides* cluster as hybrids 'carved' into shared ecological niches  
87 facilitating horizontal gene transfer.

88 The *M. mycoides* cluster - in its strict definition, which excludes some relatively close  
89 species such as *M. yeatsii* or *M. putrefaciens* - is an ecologically, phenotypically and genetically  
90 cohesive group of five major pathogenic ruminant (sub)species whose taxonomy was amended  
91 in 2009 despite conflict between phylogeny and taxonomy (Cottew et al., 1987; Manso-Silvan et  
92 al., 2007). The *M. mycoides* cluster includes four subspecies responsible for diseases listed by the  
93 World Organization for Animal Health (WOAH), namely *M. mycoides* subsp. *mycoides* (*Mmm*) and

94 *M. capricolum* subsp. *capripneumoniae* (*Mccp*) which are the causative agents of contagious  
95 bovine and caprine pleuropneumonia, respectively, and *M. mycoides* subsp. *capri* (*Mmc*) and *M.*  
96 *capricolum* subsp. *capricolum* (*Mcap*) which are etiological agents of contagious agalactia. It also  
97 includes a fifth taxon pathogenic to cattle, *M. leachii*, which is a chimera between *mycoides* and  
98 *capricolum* species that is seldom isolated (Manso-Silvan et al., 2009; Tardy et al., 2009; Fischer  
99 et al., 2012). The closely related species *M. feriruminatoris* was described ten years ago (Jores et  
100 al., 2013) and later proposed to be part of the *M. mycoides* cluster in its enlarged definition  
101 (Ambroset et al., 2017).

102 Over time, isolates of *M. feriruminatoris* have been collected from wild *Caprinae*, i.e. the  
103 Alpine ibex (*Capra ibex*) or Rocky Mountain goat (*Oreamnos americanus*), either in the wild or in  
104 zoos (Fischer et al., 2012, Tardy et al., 2012; Jores et al., 2013; Ambroset et al., 2017). They all  
105 share rapid growth *in vitro*, with a generation time of 27–29 min at 37°C (Fischer et al., 2013; Jores  
106 et al., 2013). Their genetic diversity was originally thought to be low, when only five isolates,  
107 mainly from a German zoo, had been investigated (Fischer et al., 2012), but was later shown to  
108 be higher once French isolates from ibex were investigated on top of the German isolates  
109 (Ambroset et al., 2017).

110 Despite a few dedicated papers and the availability of the genome of the type strain  
111 (G5847<sup>T</sup>), there are still gaps in knowledge of the *M. feriruminatoris* species. First, no specific  
112 virulence factors have been highlighted in the first genome announcement (Fischer et al., 2013),  
113 even though *M. feriruminatoris* strains are genetically equipped to produce H<sub>2</sub>O<sub>2</sub> (Jores et al.,  
114 2013), which is a potential virulence factor of mycoplasmas, that is controversially discussed (Vilei  
115 and Frey, 2001, Szczepanek et al., 2014, Schumacher et al., 2019, Jores et al. 2020). Furthermore,

116 *M. feriruminatoris* has been shown to produce one or two—depending on the isolate—types of  
117 capsular polysaccharides (galactan and/or  $\beta$ -1→6-glucan) (Ambroset et al., 2017), which is a true  
118 virulence factor for *Mycoplasma mycoides* (Gaurivaud et al., 2014, 2016; Jores et al., 2019).  
119 Second, questions remain about the level of divergence of *M. feriruminatoris* from members of  
120 the Mycoides cluster in terms of gene content and genome organization. Third, the fast-growing  
121 capacity of *M. feriruminatoris* makes it an attractive species for the rational design of vaccine  
122 chassis (Talenton et al., 2022), but the genetic bases for its fast growth are still unknown.

123         Here we used comparative genomics data to characterize the species *M. feriruminatoris*.  
124 The genomes of 14 *M. feriruminatoris* strains isolated over a 30-year period from 1987 until 2017,  
125 either from captive wild ruminants in zoos (n=5) or from free-roaming wild ruminants (n=9, mainly  
126 the French Alps) were compared to each other and to genomes from closely-related species in  
127 terms of synteny, gene content, phylogeny, and specific features associated with virulence or host  
128 adaptation.

129

## 130 **Material and Methods**

131 **Strains, culture conditions, and molecular biology methods.** *M. feriruminatoris* strains were  
132 sourced from previous studies (Fischer et al., 2012; Tardy et al., 2012; Jores et al., 2013), from the  
133 Vigimyc network (strain F11561; Poumarat et al., 2014) and isolated from the diagnostic unit of  
134 the Institute of Veterinary Bacteriology at the University of Bern (isolate 14/OD\_0492). Species  
135 assignment was verified using the species-specific PCR reported previously (Ambroset et al.,  
136 2017).

137 All strains were cultured in PPLO medium supplemented as previously described (Poumarat et al.,  
138 1992) at 37°C with 5% CO<sub>2</sub>. Genomic DNA extraction was performed on cultures in mid-  
139 exponential phase using either 2 mL cultures for the phenol-chloroform method (Chen and Kuo,  
140 1993) or 10 mL cultures for the NucleoBond AXG column commercial kit (Machery-Nagel).

141 **Genome sequencing, assembly and annotation.** The full genome sequences of strains  
142 G5813/1+2, G1650, G1705, 8756-13 and 14/OD\_0492 were obtained using PacBio sequencing  
143 technology, and deposited in GenBank under the accession numbers LR738858.1, LR739234.1,  
144 LR739233.1, LR739235.1, and LR739237.1, respectively. Whole-genome sequencing of *M.*  
145 *feriruminatoris* strains F11561, L13461, L14815, L14822, L15181, L15220, L15407 and L15568 was  
146 performed using a combination of Oxford Nanopore (ONT) and Illumina (paired-end 250 bp  
147 library) technologies (Table S1). The ONT reads were base-called using Guppy and demultiplexed  
148 using qcat (v.1.0.3, available at <https://github.com/nanoporetech/qcat>). The Illumina reads were  
149 trimmed using Trimmomatic (v.0.36, available at <https://github.com/usadellab/Trimmomatic>)  
150 (Bolger et al., 2014), and the Illumina adapters, i.e. the first 5 bp and both ends, were removed  
151 using a 5-bp sliding window with a phred score of under 20. Quality of the Illumina reads was  
152 assessed before and after trimming using fastqc (v.0.11.5, available at  
153 <https://www.bioinformatics.babraham.ac.uk/projects/fastqc>). The ONT reads were filtered using  
154 filtlong (v.0.2.0, available at <https://github.com/rrwick/Filtlong>), and reads with a length <250 bp  
155 or sharing <87% identity with the trimmed Illumina reads were excluded. The long reads were  
156 assembled using canu (v1.8, available at <https://github.com/marbl/canu>) (Koren et al., 2017) with  
157 an expected genome size of 1 Mbp.

158 The initial assembly was polished by iterative alignment of the trimmed Illumina reads using bwa-  
159 mem (v.0.7.15, available at <https://github.com/lh3/bwa>) (Li and Durbin, 2009) followed by  
160 correction using pilon (v.1.22, available at <https://github.com/broadinstitute/pilon>) (Walker et  
161 al., 2014). The final manual polishing was done by iteratively performing a variant calling pipeline  
162 and correcting the variant positions in the assemblies between each iteration. The variant calling  
163 pipeline used bwa-mem to map the Illumina reads. GATK (v.3.7, available at  
164 <https://github.com/broadinstitute/gatk/>) IndelRealigner (McKenna et al., 2010) was then used to  
165 perform local realignment around indels, read mate coordinates were added using the SAMtools  
166 (v.1.5, available at <https://github.com/samtools/samtools>) (Li et al., 2009) fixmate command,  
167 duplicate reads were marked with the Picard toolkit (v.2.18.9, available at  
168 <https://broadinstitute.github.io/picard>), and finally the variant positions were called using GATK  
169 HaplotypeCaller with ploidy set to 1. The corrected genomes were then manually circularized and  
170 annotated using prokka (v.1.12, available at <https://github.com/tseemann/prokka>) (Seemann,  
171 2014). The completed genomes were submitted to GenBank (Table 1).

172 **Comparative genomic analysis.** Homologous protein sequence clustering was performed using  
173 get\_homologues (v.05032019, available at [https://github.com/eead-csic-](https://github.com/eead-csic-compbio/get_homologues)  
174 [compbio/get\\_homologues](https://github.com/eead-csic-compbio/get_homologues)) (Contreras-Moreira and Vinuesa, 2013) with the COGtriangle  
175 (Kristensen et al., 2010) clustering algorithm. Multiple sets of genomes were analyzed. One set  
176 included the *M. feriruminatoris* genomes only and was used to identify the core genome and pan-  
177 genome of this species. A second set included the *M. feriruminatoris* genomes as well as the *Mmc*  
178 GM12 genome (RefSeq accession no. NZ\_CP001668) and was used to build the *M. feriruminatoris*  
179 phylogenetic tree. A third set included the *M. feriruminatoris* genomes, multiple complete



180 genomes from members of the *M. mycoides* cluster, i.e. *Mmc* GM12 and 95010 (RefSeq accession  
181 nos. NZ\_CP001668 and NC\_015431), *Mmm* Glasdysdale, PG1, Ben1, Ben50, Ben468,  
182 izsam\_mm5713 and T1/44 (RefSeq accession nos. NC\_021025, NC\_005364, NZ\_CP011260,  
183 NZ\_CP011261, NZ\_CP011264, NZ\_CP010267 and NZ\_CP014346), *Mcap* ATCC 27343 (RefSeq  
184 accession nos. NC\_007633) *Mccp* 9231-Abomsa, 87001, M1601, ILRI181 and F38 (RefSeq  
185 accession nos. NZ\_LM995445, NZ\_CP006959, NZ\_CP017125, NZ\_LN515399 and NZ\_LN515398)  
186 and *M. leachii* PG50 (RefSeq accession no. NC\_014751). This set also included other *Mycoplasma*  
187 strains, i.e. *M. putrefaciens* KS1, Mput9231 and NCTC10155 (RefSeQ accession no. NC\_015946,  
188 NC\_021083 and NZ\_LS991954), *M. yeatsii* GM274B (RefSeq accession no. NZ\_CP007520). Finally,  
189 the genome of *Mesoplasma florum* L1 (RefSeq accession no. NC\_006055) was also used as an  
190 outgroup for construction of the phylogenetic tree.

191 In order to compare core and pan-genomes of *M. feriruminatoris* and related species, all the  
192 proteins of a combined set including the *M. mycoides* cluster members, *M. yeatsii*, *M.*  
193 *putrefaciens*, *Mesoplasma (Me) florum* and *M. feriruminatoris* were clustered based on sequence  
194 similarity. Three sets of genomes were compared, each with their own core and pan-genome  
195 reconstructed based on these clusters. One set was formed with the 14 *M. feriruminatoris* strains,  
196 the second set was formed with the 4 *M. yeatsii* and *M. putrefaciens* strains, and the third set was  
197 formed with the 16 *M. mycoides*-cluster strains available in databases. *Me. florum* was excluded  
198 from the sets, but its proteins were used as an outgroup during the clustering process.

199 Synteny of the *M. feriruminatoris* genome was analyzed by whole-genome alignment using  
200 Mauve (v.20150226, available at <https://darlinglab.org/mauve/mauve.html>) (Darling et al., 2004,  
201 2010). Synteny of the single-copy core genes in all the *Mycoplasma* genomes was visualized using

202 the GMV genome browser (v.1e-93, available at  
203 <http://murasaki.dna.bio.keio.ac.jp/wiki/index.php?GMV>) (Popendorf et al., 2010). Proteins  
204 located in the putative *M. feriruminatoris* Mycoplasma Integrative Conjugative Elements (MICE)  
205 were compared to the proteins of ICEA<sub>5632</sub>-I from *M. agalactiae* 5632 and ICEM from *Mmc* GM12  
206 (Citti et al., 2018) using BLASTp (v. 2.9.0, available at  
207 <https://ftp.ncbi.nlm.nih.gov/blast/executables/blast+/LATEST/>). Insertion sequence (IS)  
208 detection was performed using ISfinder (available at <https://isfinder.biotoul.fr/>) (Siguier et al.,  
209 2006).

#### 210 **DUF285 protein analysis.**

211 All predicted protein sequences in the *M. feriruminatoris* genomes were screened for DUF285  
212 domains using CD-search (Marchler-Bauer and Bryant, 2004). Motif detection was then  
213 performed using MEME (v. 5.0.5, available at <https://meme-suite.org/meme/>) (Bailey et al.,  
214 2009), initially with default parameters but then adjusting the motif length to 25 and 16 amino  
215 acids in two separate runs to refine the motifs. The motifs found in all the predicted proteins were  
216 then detected using MAST (v. 5.0.5, available at <https://meme-suite.org/meme/>) (Bailey et al.,  
217 2009) in its default parameters. Protein signal peptides were predicted using SignalP (v. 6.0,  
218 available at <https://services.healthtech.dtu.dk/services/SignalP-6.0/>) (Teufel et al., 2022), and  
219 transmembrane domains were predicted using DeepTMHMM (available at  
220 <https://dtu.biolib.com/DeepTMHMM>) (Hallgren et al., 2022).

#### 221 ***In silico* analysis of polysaccharide pathways.**

222 tBlastX analysis was used to retrieve putative enzymes involved in polysaccharide synthesis and  
223 described in *M. feriruminatoris* strain G5847<sup>T</sup> (Ambroset et al., 2017) and in other mycoplasma  
224 species (Gaurivaud et al., 2016; Schieck et al., 2016). A prediction of transmembrane regions was  
225 carried out by TMHMM2 (available at [https://services.healthtech.dtu.dk/services/TMHMM-](https://services.healthtech.dtu.dk/services/TMHMM-2.0/)  
226 2.0/)(Krogh et al., 2001) and the synthase-specific cytoplasmic domain with the DXD and  
227 R/QXXRW-like motifs were identified by alignment with the galactan synthase MSC\_0108 from  
228 *Mmm* PG1<sup>T</sup> or GsmA from *M. agalactiae* 14628.

### 229 **Phylogenetic tree construction.**

230 The phylogenetic trees were constructed using respectively 555 single-copy core genes for the  
231 intra-species tree (Figure 1B) and 294 single-copy core genes for the tree including other strains  
232 for the *M. mycoides* cluster (Figure 5). For each set, the protein sequences were aligned using  
233 Clustal Omega (v.1.2.1, available at <http://www.clustal.org/omega/>) (Sievers et al., 2011) and the  
234 alignments were then concatenated. Unaligned and low-confidence regions were removed from  
235 the alignment using Gblocks (v.0.91b, available at  
236 [molevol.cmima.csic.es/castresana/Gblocks.html](http://molevol.cmima.csic.es/castresana/Gblocks.html)) (Talavera and Castresana, 2007), thus  
237 producing sequence matrices of 186,920 and 92,785 amino acid sites for the *M. feriruminatoris*  
238 tree and the *M. mycoides* tree, respectively. The evolution model for tree construction was  
239 determined using ProtTest (v.3.4.2, available at <https://github.com/ddarriba/prottest3>) (Darriba  
240 et al., 2011), and in both cases the CpREV model (Adachi et al., 2000) was identified as the best  
241 model. The trees were then created with RaxML (v.8.2.12, available at  
242 <https://github.com/stamatak/standard-RAxML>) (Stamatakis, 2014) using the GAMMA model of  
243 rate of heterogeneity, and 450 and 150 bootstrap replicates were made for the *M. feriruminatoris*

244 tree and the *M. mycoides* tree, respectively, using the autoFC bootstopping criterion to determine  
245 the number of replicates.

## 246 **Ancestral genome reconstruction.**

247 The evolution of the gene-family contents over the course of the evolution of *Mycoplasma* species  
248 included in this work was studied using the COUNT software (available at  
249 [http://www.iro.umontreal.ca/~csuros/gene\\_content/count.html](http://www.iro.umontreal.ca/~csuros/gene_content/count.html)) (Csurös, 2010). We used the  
250 phylogenetic tree described above with 14 *M. feriruminatoris* strains, 16 *M. mycoides* cluster-  
251 related strains, 3 *M. putrefaciens* strains, 1 *M. yeatsii* strain and the outgroup *Me. florum*, and we  
252 used the presence/absence matrix produced in the comparative analysis to monitor the  
253 occurrence of 2615 gene families. We used a birth-and-death model to calculate the posterior  
254 probabilities, and we used a gain–loss model with a Poisson distribution at the root and set the  
255 edge length, loss and gain rates at 4 gamma categories to maximize the likelihood of the  
256 optimized model.

257

## 258 **Results and Discussion**

### 259 **A homogeneous species with a closed pan-genome.**

260 In order to get an overview of the *M. feriruminatoris* species and further investigate its  
261 evolutionary relationship with other species from the *M. mycoides* cluster, we sequenced the  
262 genome of 13 strains isolated from different regions and years and from animals showing  
263 different clinical signs (Table 1). We used a combination of Illumina short reads and PacBio or ONT

264 long reads to produce complete circular chromosome sequences for all the strains. Strain G5847<sup>T</sup>  
265 was included in the comparative genomic analysis. The average chromosome size of the 14 strains  
266 was  $1,040 \pm 24$  kbp with the smallest and largest genome at 1,011,470 bp and 1,084,342 bp for  
267 strains F11561 and L14822, respectively (Table 1). As expected for members of the class  
268 *Mollicutes*, the G+C content of the genomes was low, at an average of  $24.24\% \pm 0.04\%$ . The  
269 genomes were annotated using prokka (Seemann, 2014) that predicted between 853 and 941  
270 (average 890) genes per genome, including 816 to 904 (average 852) protein-encoding genes  
271 (Table 1). Each genome had two rRNA loci encoding the 5S, 16S and 23S rRNAs separated by  
272 approximately 318 kbp and located on the same half of the genome relative to the chromosomal  
273 origin of replication and the terminus (Figure 1A). A total of 30 tRNAs genes and a single tmRNA  
274 were predicted in every genome.

275 A total of 11,935 proteins were predicted from the 14 *M. feriruminatoris* genomes. A phylogenetic  
276 tree was built using the sequence of 555 single-copy core proteins found in all *M. feriruminatoris*  
277 strains and in *Mmc* strain GM12 which was used as the outgroup (Figure 1B). In the resulting tree,  
278 *M. feriruminatoris* strains were grouped into a homogeneous single branch at a short distance  
279 from the *Mmc* root. Four strains, i.e. G5847<sup>T</sup>, G1650, G1705 and G5812/1+2, that had been  
280 isolated in a narrow time-window (1993–1994) from ibexes that were hosted in Berlin zoo and  
281 showed similar clinical signs, were very closely related, as expected. However, besides these zoo  
282 strains, we found no further correlation between phylogenetic branches and location or time of  
283 isolation. For example, the most-recently isolated strain F11561 (2017) and the least-recently  
284 isolated strain 8756-13 (1987), which were also isolated on two separate continents (Europe and  
285 North America, respectively), were found in the same branch. The core and pan-genomes of the

286 *M. feriruminatoris* species were determined based on the 11,390 proteins grouped in 1,312  
287 clusters of homologs retrieved from the 14 *M. feriruminatoris* genomes (Figure 2).

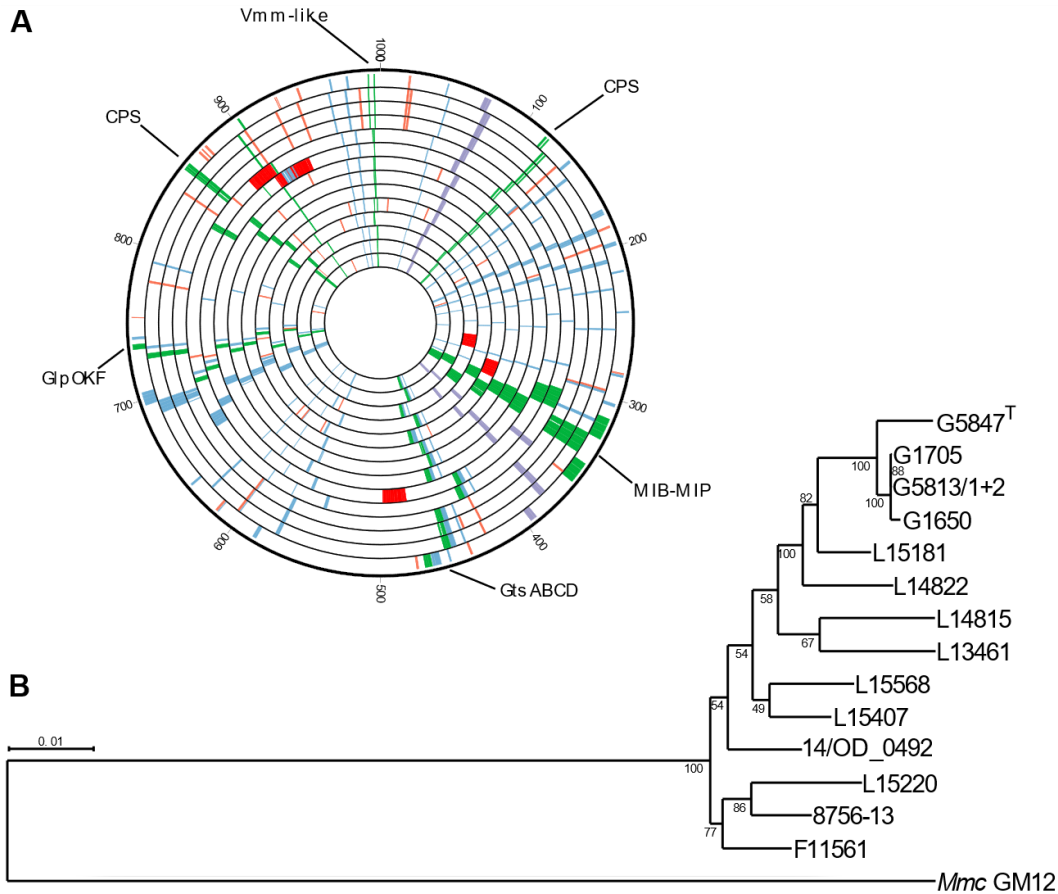

288

**Figure 1. Genomic structure and phylogeny of the *M. feriruminatoris* genomes.** (A) circular representation of all the *M. feriruminatoris* genomes, with size normalized to 1 Mbp. From outer to inner circles, the genomes are G5847<sup>T</sup>, G1650, G1705, G5813/1+2, L15181, L14822, L14815, L15407, L15568, 14/OD0492, L15220, 8756-C13, F11561 and L13461. Genes are colored based on function, with virulence genes in green, insertion sequences (IS) in orange, rRNAs in purple, DUF285 proteins in blue, and MICE genes in red. (B) Phylogenetic tree of the *M. feriruminatoris* strains. The tree was constructed using the maximum-likelihood method and inferred from the concatenated alignments of 555 single-copy core protein sequences. The alignment matrix contained 186,920 amino acid sites. *Mmc* strain GM12 was used as the outgroup, and 450 bootstrap replicates were run. Bootstrap values are shown as node labels.

289

290 A core set of 628 clusters of protein-encoding genes was present in every genome, representing  
 291 an average of 47.9% of all clusters within a given strain. Considering possible sequencing errors,  
 292 this value was extended to 708 clusters of persistent gene predicted from at least 13 out of the  
 293 14 genomes.

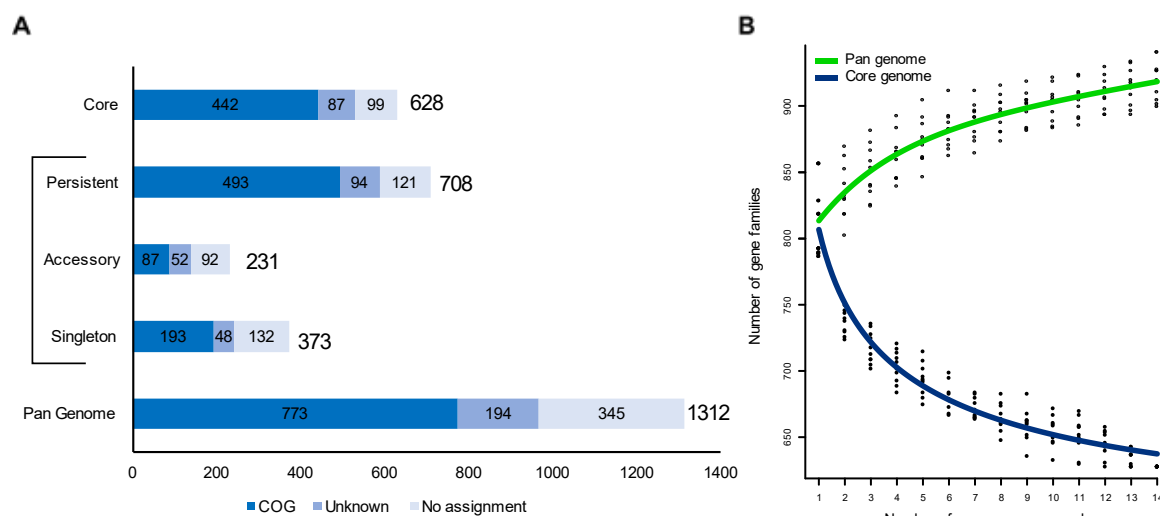

294

**Figure 2. Core and pan-genomes of the *M. feriruminatoris* species. (A).** The pan-genome is composed of 1,312 gene families encoding proteins, of which 373 are singletons (present in a single genome), 708 are persistent (present in at least 13/14 genomes), 628 are core (present in all genomes), and the remainder ( $n=301$ ) are accessory (present in 2 to 12 genomes). The sum of persistent, accessory and singleton genes constitute the total pan-genome genes. Gene families with predicted eggNOG (NOG) function categories are indicated as follows: dark blue, known; medium blue, unknown; light blue, no assignment. **(B).** Gene number estimation curves for the *M. feriruminatoris* core genome (blue, bottom curve) and pan-genomes (green, top curve) were generated using the methods described in Willenbrock et al. (2007) and Tettelin et al. (2005), respectively.

295

296 A total of 373 singleton protein clusters representing 28.4% of all clusters were present in only  
 297 one strain. The *M. feriruminatoris* strains had an average of  $27 \pm 17$  singleton clusters  
 298 representing 3.2% of their total number of different clusters, but most of them contained short  
 299 protein sequences measuring less than 200 amino acids, which suggests that many could be  
 300 annotation artifacts (i.e. pseudogene remnants). These potential artifacts in strain-specific

301 proteins together with the slow rise of the pan-genome estimation curve (Figure 2B) suggest that  
302 the *M. feriruminatoris* species possesses a closed pan-genome with most gene families shared  
303 between multiple strains, which is consistent with the recently proposed genomic definition of a  
304 bacterial species (Moldovan and Gelfand, 2018).

305 A detailed analysis of the distribution of gene families from the core, persistent, accessory and  
306 singleton genomes into different functional categories was then undertaken (Figure S1). Among  
307 the 1312 gene families of the *M. feriruminatoris* pan-genome, only 773 (58.9%) were assigned to  
308 non-supervised orthologous groups (eggNOG) with one or several functional categories, whereas  
309 194 (14.8%) were assigned to an eggNOG with unknown functional category, and 345 (26.3%)  
310 were not assigned. In the *M. feriruminatoris* core and persistent genomes, there were 444 (33.8%)  
311 and 506 (38.6%) clusters assigned to an eggNOG with a known function, respectively, most of  
312 which were related to genetic information storage and processing (14.2% of core and 16.2% of  
313 persistent genomes) and metabolism (14.9% of core and 16.2% of persistent genomes). Only 89  
314 (6.9%) clusters from the accessory genome were assigned to an eggNOG with a known function,  
315 of which 41 (3.1%) were associated with genetic information storage and processing functions.  
316 Within the singleton genome, 132 (10.1%) clusters were not assigned to an eggNOG, and 48  
317 (3.6%) were assigned to an eggNOG with an unknown function. Of the 193 clusters (51.7% of  
318 singletons) with known eggNOG categories, 106 (28.7% of singletons) were related to genetic  
319 information storage and processing. Strain-specific clusters included a substantial proportion of  
320 proteins dedicated to defense mechanisms (V category, 22/373 against 13/628 in the core  
321 genome) (Figure S1). Although the eggNOG domain of 'genetic information storage and  
322 processing' categories appeared to be highly represented in core, persistent, accessory and



323 singleton genomes, further analysis revealed significant differences. Although the persistent  
324 genome encompassed 82.3% (126/153) and 66.6% (32/48) of gene families from categories J  
325 (translation, ribosomal structure and biogenesis) and K (transcription), it only encompassed  
326 35.5% (54/152) of gene families for category L (replication, recombination and repair), whereas  
327 the singleton genome encompassed 41.5% (63/152) of category-L gene families, which suggests  
328 fast turnover of some genes. Further analysis indicated that many of these highly volatile genes  
329 could be associated with mobile genetic elements (MGE) such as IS or MICEs. The 154 gene  
330 families involved in cellular processes and signaling represented 17.8% of the gene families with  
331 known eggNOG function categories, the most represented category being V (defense mechanism)  
332 with 16 and 22 families present in accessory and singleton genomes, respectively, which also  
333 suggests a fast evolution of the corresponding repertoire of genes among *M. feriruminatoris*  
334 strains. Taken together, our findings from detailed analysis of the *M. feriruminatoris* pan-genome  
335 point to a global conservation of genes families involved in information processing and central  
336 metabolism and more strain-specific repertoires associated with MGEs and defense mechanisms.

337

### 338 **A highly syntenic structure, locally influenced by the mobilome.**

339 Synteny blocks from the 14 *M. feriruminatoris* genomes shared mostly the same order (Figure  
340 3A). There was no observable major reorganization except one noticeable ~35 kbp duplication  
341 event in the G5847<sup>T</sup> genome (Talenton et al., 2022), resulting in six copies of the immunoglobulin  
342 cleavage proteins MIB and MIP (Arfi et al., 2016) while the other strains had either three or four  
343 copies.

344 A synteny block of ~23 kbp found in strains L15181, L14822, 14/OD\_0492 and L15220 was shown  
345 to be located in different regions and orientations depending on the strain (Figure 3A, red block  
346 tagged with an asterisk). Upon closer inspection, these loci were shown to be akin to the MICE  
347 identified in *Mmc* GM12 (Figure 3B). Almost all the *Mmc* GM12 MICE genes had a homolog in the  
348 *M. feriruminatoris* MICEs and were also in the same order. A second putative MICE was identified  
349 in strain L14822, although with a slightly different structure and encoding multiple proteins within  
350 the DUF285 domain. With the exception of strain 14/OD-0492 that had none, all *M.*  
351 *feriruminatoris* strains presented variable numbers of IS highly related (>87% transposase  
352 similarity) to IS3 found in *M. mycoides*-cluster mycoplasmas (Table 1). Most strains had up to  
353 three complete or degraded copies, while some, notably those from zoo isolates, had 12 to 14  
354 copies. The surge of ISs observed in these strains did not modify the genome organization, which  
355 contrasts with large inversions evidenced in the genomes of some *M. mycoides*-cluster strains  
356 such as *Mmc* 95010 (Thiaucourt et al., 2011), PG3 and 152/93 (Hill et al., 2021) and *Mmm* T1/44  
357 (Gourgues et al., 2016). We found no traces of prophages or CRISPR loci in *M. feriruminatoris*  
358 genomes. Only one out of the 14 strains (L15220) was shown to harbor a 3,301 bp plasmid. The  
359 pL15220 plasmid was longer than most of the plasmids described so far within the *M. mycoides*  
360 cluster but close to the size of pMyBK1 plasmid from *M. yeatsii* (3,432 bp) (Breton et al., 2012),  
361 and had a G+C content of 26.5%. The strongest pairwise nucleotide identity with mycoplasma  
362 plasmids was obtained with pMmc-95010 (1,850 pb and 48.6% of identity) (Thiaucourt et al.,  
363 2011), despite a noticeable difference in size of circa 1,400 bp.

364

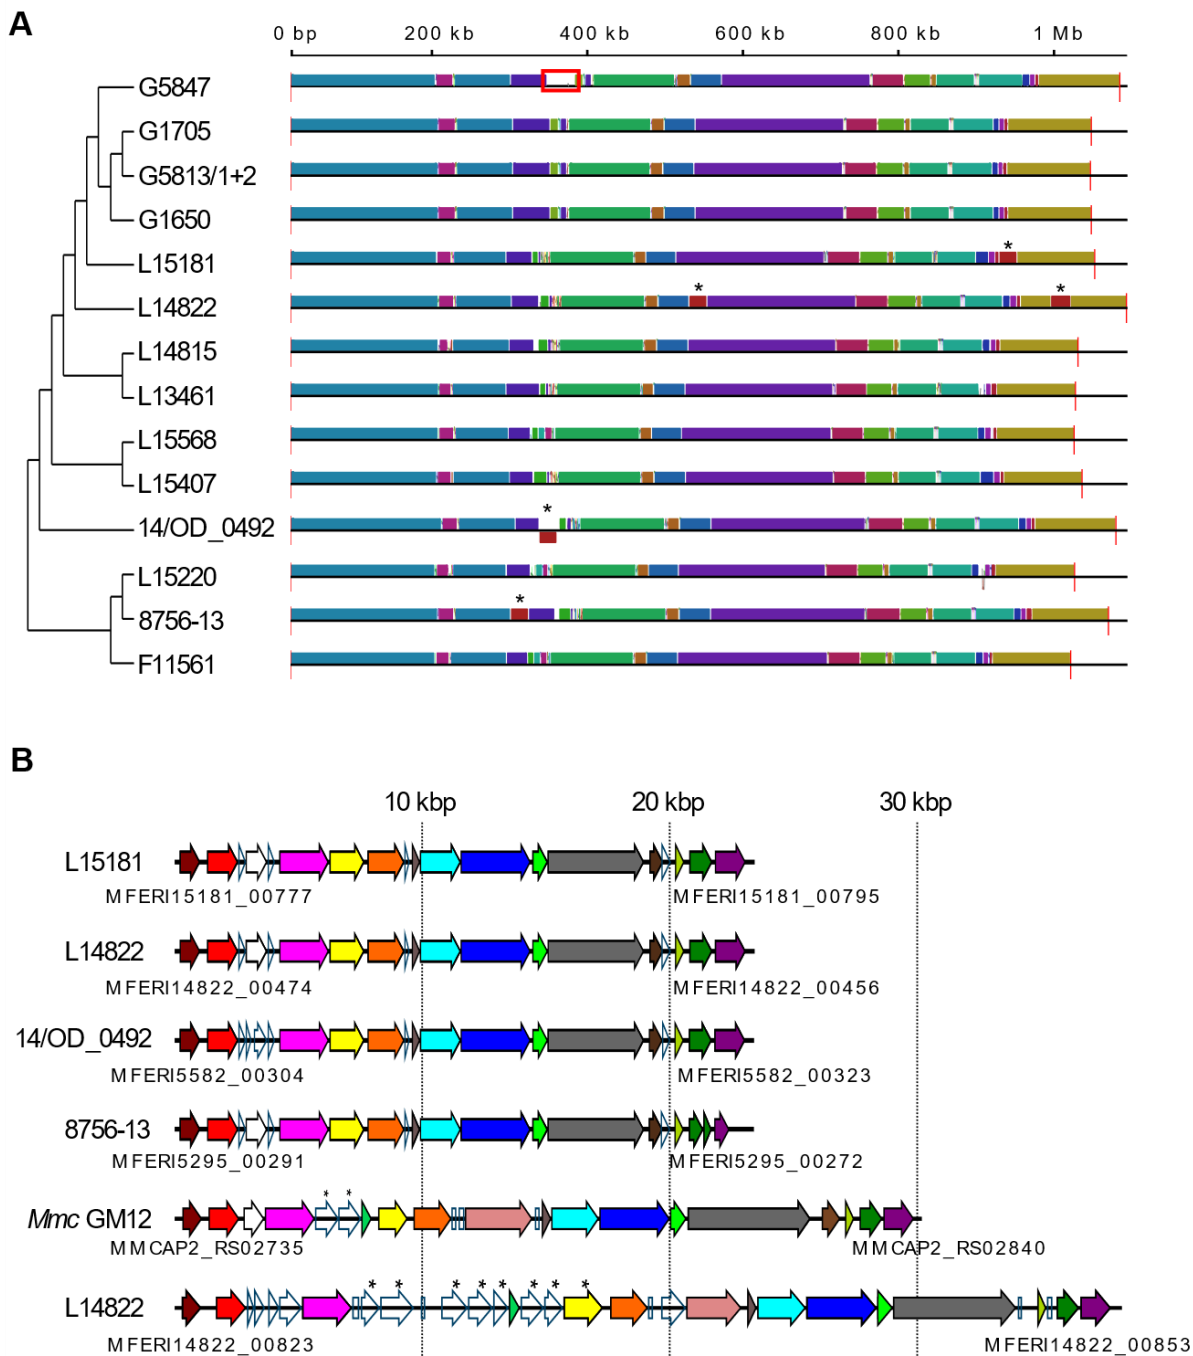

**Figure 3. Synteny between the *M. feriruminatoris* genomes. (A)** Conserved synteny blocks shared by the different strains. The tree topology represented on the left side corresponds to the tree in Figure 1B. MICE locations are identified with an asterisk, and the 35 kbp duplication in strain G5847T is framed in red. **(B)** *M. feriruminatoris* MICE structure. Homologous genes between the *M. feriruminatoris* and *Mmc* GM12 MICEs are represented with the same color. The MICE strain of origin is indicated on the left of each MICE, and the locus tags of the first and last genes of the MICEs are specified under their respective track.

365

366

367 The pL15220 plasmid encodes two CDSs, including a hypothetical protein and a predicted CopG-  
368 family transcriptional regulator sharing 82% nucleotide identity with its homolog in pMmc-95010  
369 and a second CDS (649 aa) with no homolog in databases (Figure S2). Noticeably, three regions of  
370 94 to 293 nt shared 76%–100% nucleotide identity with three different regions of the L14822-  
371 specific MICE, a feature already described in work comparing the plasmid and MICE of the *Mmc*  
372 95010 strain (Thiaucourt et al., 2011) and that suggests genetic exchanges among these MGEs.  
373 The pL15220 plasmid does not encode a Rep2 protein with a pfam01719 domain shared by most  
374 replicases (Breton et al., 2012). This finding is consistent with the absence of a double-strand  
375 origin (dso) where the Rep proteins normally cleave (at a conserved site TACTAC(C)G/A) the  
376 positive DNA strand to start the rolling-circle replication (Moscoso et al., 1995). In contrast, an  
377 sso block (lagging-strand initiation site) similar to pMmc-95010 was identified next to the HP  
378 encoding gene. Its mosaic structure together with the presence of a CDS encoding a hypothetical  
379 protein with no homologs in databases suggests that the pL15220 plasmid may belong to a new  
380 plasmid family whose emergence was marked by recombination events with other mycoplasma  
381 plasmids and MICEs.

382 Because of its overall highly conserved genome synteny and its coherent positioning within the  
383 intraspecies phylogeny tree, *M. feriruminatoris* G5847<sup>T</sup> might be considered a valuable  
384 representative of the species. In many cases, the very first strain chosen for genome sequencing  
385 is a lab strain that has encountered an unknown number of passages and whose origin often  
386 remains unclear. This was the case for the *Mmm* PG1<sup>T</sup> genome sequenced in 2004 whereas the  
387 isolate dated back to 1931 (Westberg et al., 2004). Soon after, PG1<sup>T</sup> was shown to differ greatly  
388 from other field strains with a notable 24-kb genetic locus repetition and hence was not the best

389 representative of this important bovine pathogen (Bischof et al., 2006). In the case of *M.*  
390 *feriruminatoris*, the G5847<sup>T</sup> isolate also has one major, near-perfect 35 kbp duplication that was  
391 not present in other genomes. This duplication was ascertained using two independent long-read  
392 sequencing strategies (Talenton et al., 2022), and we concluded it may have occurred during  
393 passages in the lab.

394

### 395 **A variable repertoire of enzymes involved in polysaccharides biosynthesis.**

396 *M. feriruminatoris* isolates were previously shown to produce a capsule composed of either  
397 galactan and/or  $\beta$ -(1→6)-glucan depending on the isolates (Ambroset et al., 2017). We used  
398 tBlastX to search for homologs of enzymes involved in polysaccharide biosynthesis, as predicted  
399 in *M. feriruminatoris* G5847<sup>T</sup> and in other *Mycoplasma* species (Gaurivaud et al., 2016; Ambroset  
400 et al., 2017; Schieck et al., 2016). A complete putative biosynthetic pathway for galactan was  
401 predicted in all *M. feriruminatoris* isolates, with genes clustered in two different genomic  
402 locations (Figures 1 and 4).

403 Eleven out of the thirteen newly sequenced strains carried two nearly identical *Gsm* genes  
404 encoding genuine galactan synthases that were homologs to the synthase encoded by MSC\_108  
405 in *Mmm* PG1<sup>T</sup> (Gaurivaud et al., 2016) and carry the typical 4 transmembrane domains (TMDs)  
406 and a cytoplasmic domain with DAD and QRMRW motifs. One is located in the glycosyl-  
407 transferase locus, and the other is located in the Gale-Glf locus (Figure 4B). In contrast, but in  
408 agreement with previous PCR findings (Ambroset et al., 2017), isolates L14822 and L15568 have  
409 one *Gsm* copy only. However, these two isolates harbor a different synthase, at the exact same  
410 position as the first *Gsm* in other strains, with 7 TMDs and a cytoplasmic domain harboring DXD

411 and RXXRW motifs, homologous to the GsmA synthase involved in  $\beta$ -(1 $\rightarrow$ 6)-glucan production in  
 412 *M. agalactiae* 14628 and *Mmc* PG3 (Bertin et al., 2015; Gaurivaud et al., 2016).

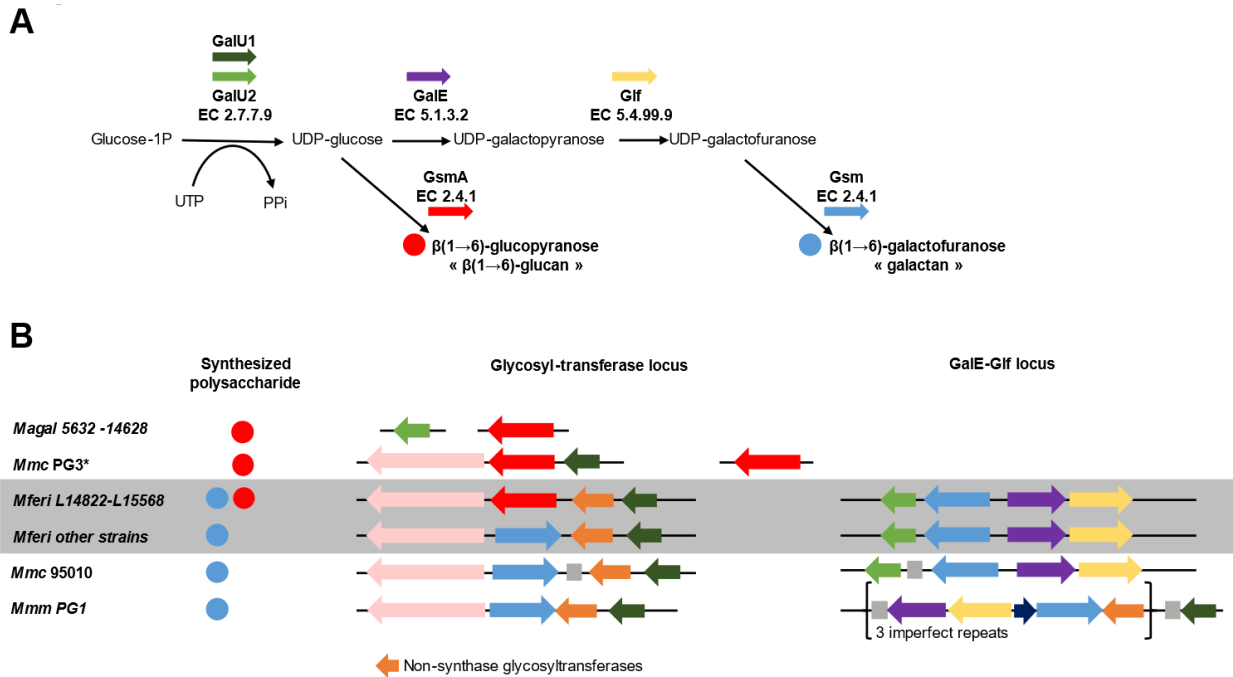

413

**Figure 4: Polysaccharide biosynthesis pathways. (A)** Schematic representation of metabolic pathways involved in  $\beta$ (1 $\rightarrow$ 6)-glucan and galactan synthesis. Glucose-1P is transformed into UDP-glucose by a glucose-1-phosphate uridylyltransferase (GalU1 or GalU2). An UDP-glucose 4-epimerase (GalE) and an UDP-galactofuranose mutase (Glf) successively transform the UDP-glucose into UDP-galactofuranose. Finally, one (or several) glycosyltransferases (GT) with synthase activity (Glycan Synthase of Mollicute, Gsm or GsmA for *M. agalactiae*) builds and exports the final polysaccharide, a polymer of galactofuranose, the galactan (blue circle) or  $\beta$ (1 $\rightarrow$ 6)-glucan (red circle). **(B)** Organization of the genes encoding the corresponding enzymes amongst genomes of the *M. mycoides*-cluster strains and *M. agalactiae* (*M. agal*). Red or blue circles indicate the nature of the polysaccharide (as in panel A), colored arrows represent coding sequences (synthases are in blue or red as in panel A, other glycosyltransferases lacking the structural signature of synthases are in orange, and dark blue and pink arrows represent hypothetical proteins and peptidases, respectively). Grey squares represent transposases.

414 The GsmA protein of *M. feriruminatoris* is closer to its homolog in *Mmc* PG3 than in *M. agalactiae*  
 415 14628 (81.2% vs 66.5% protein identity). The GsmA proteins of isolates L14822 and L15568 are  
 416 99.9% identical. This ‘surgical’ genomic ‘replacement’ of a Gsm gene by a GsmA gene in two  
 417 isolates only and the mechanism beyond the replacement are an intriguing feature of the  
 418 otherwise very syntenic clusters for polysaccharide biosynthesis.

419

420 **A large repertoire of lipoproteins and proteins with DUF285 domains.**

421 Using SignalP, we found 1,104 lipoprotein signal peptides in the 14 *M. feriruminatoris* genomes  
422 corresponding to an average of 79 [77–83] lipoproteins per strain. BlastP analyses confirmed the  
423 presence of the usual main immunogenic lipoprotein repertoires of the *M. mycoides* cluster,  
424 including LppA, LppB, LppC, LppQ and the variable surface protein Vmm. In each genome, LppB,  
425 LppC or LppQ genes were present in a unique copy, whereas up to four genes encoding LppA and  
426 6 to 7 Vmm copies were detected per genome. Interestingly, isolates collected from wild ibex had  
427 3 to 4 copies of the LppA gene, with either two pairs of adjacent genes in different regions or one  
428 pair and a singleton, whereas isolates from zoos harbored one to three copies of the gene and  
429 several (up to 4) truncated genes. The proximity of IS could explain the presence of duplicated,  
430 truncated LppA-encoding genes.

431 Lipoproteins with multiple DUF285 domains were also detected in all *M. feriruminatoris* genomes  
432 (Figure S3). DUF285 domains are presented as one of the top 10 relevant domains for animal host  
433 classification (Kamminga et al., 2017). Proteins with DUF285 domains, of as-yet unknown  
434 function, are also found in the members of the *M. mycoides* cluster (Sirand-Pugnet et al, 2007)  
435 and in other ruminant mycoplasmas including *M. agalactiae* and *M. bovis*. DUF285-domain  
436 proteins contain varying numbers of 25 amino acid long-tandem repeats (Röske et al, 2010). The  
437 tandem repeats of the *M. feriruminatoris* DUF285 proteins are also preceded by a 16-residue  
438 motif of 12 to 14 amino acids upstream of the first repeat (Figure S3A). This upstream motif is  
439 found for almost every DUF285 protein, the only exceptions being proteins < 200 amino acids  
440 long (Figure S3B). Furthermore, this upstream motif was only found in DUF285 proteins. A total

441 of 380 DUF285 proteins were found in *M. feriruminatoris* genomes, i.e. an average of 27 DUF285  
442 domain proteins per strain. The DUF285 proteins grouped into 51 clusters based on the  
443 comparative genomic analysis, and 11 of them were part of the core genome. Two of the core  
444 DUF285 protein clusters are also duplicated between two to five times in every strain. The  
445 DUF285 protein clusters present in at least 10 strains are mostly predicted to also possess a signal  
446 peptide or a lipoprotein signal peptide, but some are also predicted to have transmembrane  
447 domains at either the C or N terminus. When more than one transmembrane domain was  
448 predicted, they were located at both the C and N terminus of the proteins. Remarkably, 8 CDS  
449 encoding DUF285 proteins were all found in the L14822-specific MICE (Figure S2).

450

451 ***M. feriruminatoris* is much closer to any member of the *M. mycoides* cluster than to either *M.***  
452 ***putrefaciens* or *M. yeatsii*.**

453 To evaluate the relatedness and specificities of *M. feriruminatoris* compared to mycoplasmas  
454 from the *M. mycoides* cluster—in its strict definition—and closely-related ruminant species (i.e.  
455 *M. yeatsii* and *M. putrefaciens*), we ran a global comparative genomics analysis including 21  
456 genomes in addition to the 14 from *M. feriruminatoris* (Table S2). In a high-resolution  
457 phylogenetic reconstruction based on 294 single-copy core proteins, *M. feriruminatoris* appeared  
458 much closer to any of the *M. mycoides* cluster members than to *M. putrefaciens* or *M. yeatsii*  
459 (Figure 5A). This result is in accordance with previous phylogenetic studies based on 16S rRNA  
460 gene sequences (Jores et al., 2013) and the single protein FusA (Ambroset et al., 2017). The  
461 monophyletic clustering of all *M. feriruminatoris* strains is also in agreement with the definition



462 of a homogeneous species. The global phylogeny therefore indicates that *M. feriruminatoris* is  
463 more closely related to the *M. mycoides* cluster than to *M. putrefaciens* and *M. yeatsii*.

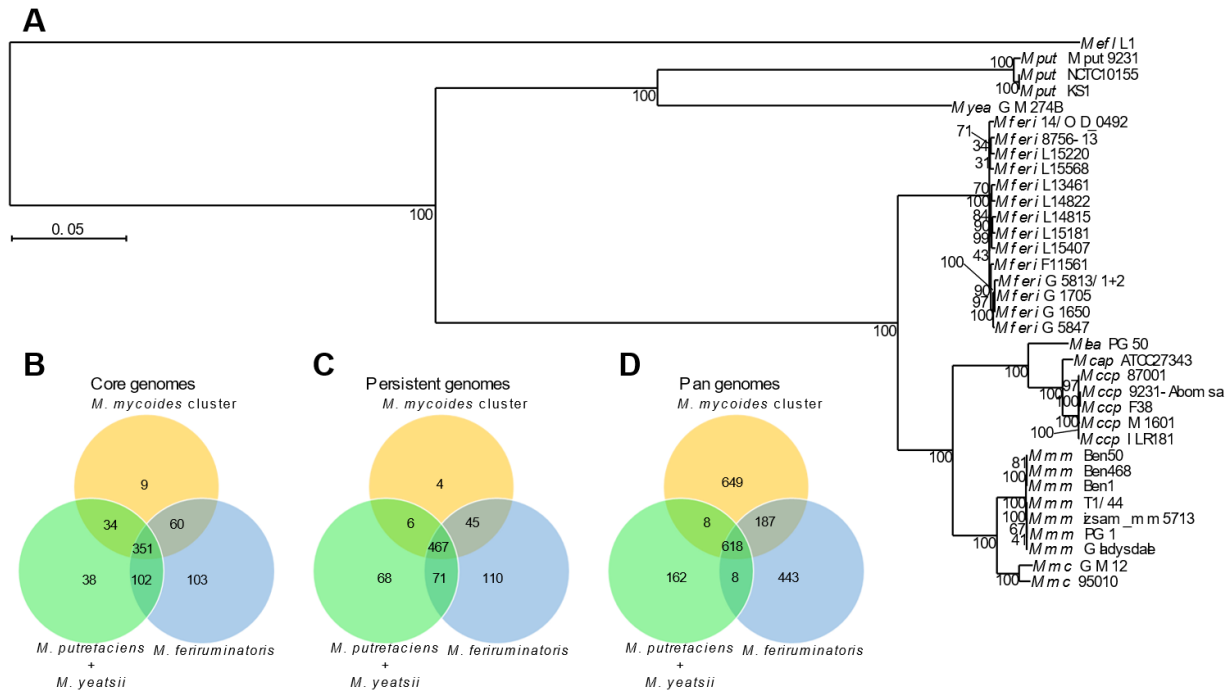

464

**Figure 5. Comparison between *M. feriruminatoris*, the *M. mycoides* cluster, and their closest relatives. (A)** A phylogenetic tree inferred using the maximum-likelihood method from the concatenated alignments of 294 single-copy core protein sequences, resulting in a total of 92,785 amino acid sites in the alignment matrix. *Me. florum* L1 was used as the outgroup, and 150 bootstrap replicates were run. Bootstrap values are shown as node labels. Venn diagrams of the protein clusters from the **(B)** core genome, **(C)** persistent genome, and **(D)** pan-genomes shared between *M. feriruminatoris*, the *M. mycoides* cluster, and their closest relatives.

465

#### 466 What makes the difference between *M. feriruminatoris* and related species?

467 To identify specificities of the *M. feriruminatoris* species compared to phylogenetically-related  
468 ruminant species, core and pan-genomes were constructed for three sets of genomes including  
469 14 *M. feriruminatoris* strains, 16 *M. mycoides*-cluster strains and 4 *M. yeatsii* and *M. putrefaciens*  
470 strains, respectively. The core genomes of each set were similar in size, with 616 clusters for *M.*

471 *feriruminatoris*, 454 for the *M. mycoides*-cluster strains, and 525 for *M. putrefaciens* and *M.*  
472 *yeatsii*. We determined the overlap between these core genomes (Figure 5B) and found that 351  
473 protein clusters were shared by all three core genomes. The *M. feriruminatoris* core genome  
474 intersects with a very similar number of genes to the other two, sharing 453 protein clusters with  
475 the *M. putrefaciens* and *M. yeatsii* core and 411 with the *M. mycoides*-cluster core. The number  
476 of shared protein clusters was extended to 467 when considering the persistent genomes instead  
477 of the strict core genomes (Figure 5C). We also compared the pan-genomes of the three sets  
478 (Figure 5D). The relatively small pan-genome for the *M. putrefaciens* and *M. yeatsii* set (796  
479 protein clusters) might be explained by both their small genome sizes and the limited number of  
480 genomes available. In contrast, the pan-genomes of the two other sets were larger, with 1,256  
481 clusters for *M. feriruminatoris* and 1,462 for the *M. mycoides* cluster. As these last two sets were  
482 composed of a similar number of ~1 Mbp genomes (Table S2), this result suggests that the gene  
483 diversity within the *M. feriruminatoris* species was comparable to the gene diversity of the whole  
484 *M. mycoides* cluster. A total of 618 protein clusters were present in at least one strain of the three  
485 sets, which represents 49.2%, 42.3% and 77.6% of the *M. feriruminatoris* pan-genome, *M.*  
486 *mycoides*-cluster pan-genome, and *M. putrefaciens*–*M. yeatsii* pan-genome, respectively. The *M.*  
487 *putrefaciens*–*M. yeatsii* pan-genome barely intersects with the other two sets, sharing only 8  
488 protein clusters with each, which further illustrates the distance between this group and the other  
489 two groups that overlap with 187 protein clusters.

490 To document the evolution of gene repertoires during the speciation process of *M. mycoides*  
491 cluster-related ruminant mycoplasmas, we employed an ancestral genome reconstruction  
492 approach using the birth-and-death model implemented in COUNT (Csurös, 2010). Starting from

493 the content of the protein clusters and the phylogenetic relationship of included genomes,  
494 ancestral genome contents were simulated at each node of the phylogenetic tree with posterior  
495 probabilities for the protein cluster sizes (Figure S4). We thus produced aggregate information for  
496 each inner node (number of clusters present with posterior probabilities superior to 0.5) and for  
497 each edge leading to the node (cluster gains, cluster losses). The last common ancestor (LCA) of  
498 *M. feriruminatoris* was proposed to include 805 protein clusters (node 16), which is close to the  
499 average calculated from the 14 *M. feriruminatoris* genomes with 786 protein clusters. Evolution  
500 from the *M. feriruminatoris*/*M. mycoides* LCA (node 32) to the *M. feriruminatoris* LCA (node 16)  
501 was associated with the gain of 17 protein clusters and the loss of 25 protein clusters (Table S3).  
502 Among the 17 gained clusters, 7 (41.2%) are specific to the *M. feriruminatoris* core genome and  
503 totally absent from species belonging to the *M. mycoides* cluster. Further investigation indicated  
504 that three clusters might be involved in bacterial defense mechanisms, and four were predicted  
505 as surface proteins.

506 The 25 lost protein clusters included eight involved in metabolism (mainly sugar transport and  
507 metabolism), seven involved in information storage and processing (i.e. restriction modification  
508 systems and MGE), and one involved in cellular processes and signaling. Note that some of the  
509 predicted losses during *M. feriruminatoris* speciation were also predicted to have happened  
510 during the evolution of other caprine mycoplasmas. This was the case for genes involved in  
511 trehalose metabolism and for the MurR-RpiR family transcription regulator that were also lost in  
512 the *M. putrefaciens*/*M. yeatsii* LCA and *Mcap*/*Mccp* LCA but maintained in the *M. leachii* LCA and  
513 the *Mmm*/*Mmc* LCA. The main nodes leading to species (nodes 16, 21, 30) and subspecies (nodes  
514 20 and 28) clearly show that these evolution steps were marked by gains of genes mainly

515 associated with defense systems and surface proteins and by losses of genes involved in various  
516 aspects of cellular life, notably carbohydrate metabolism (Table S3). These differences in gene  
517 categories involved in gains and losses during the emergence of *M. feriruminatoris* suggest that  
518 the speciation process might be associated with key metabolic changes and with developments  
519 of elements (surface proteins) involved in host–pathogen interaction.

520

521 One of the main traits of the *M. feriruminatoris* species is its fast-growing capacity in axenic  
522 media, with a reported doubling time of ~30 min at 37°C (Jores et al., 2013). In comparison,  
523 members of the *M. mycoides* cluster have generation times ranging from 80–200 min (March et  
524 al., 2000; Lartigue et al., 2007; Jores et al., 2013; Jores et al., 2019; Hutchison III et al., 2016). Our  
525 comparative analyses did not identify specific metabolic pathways that could explain this  
526 noticeable difference. In order to further investigate the genetic basis of the fast-growing *M.*  
527 *feriruminatoris* phenotype, we compared the genomic regions encompassing the predicted  
528 replication origins of the chromosomes of *M. feriruminatoris* strains and related species (Figure  
529 S5). All *M. feriruminatoris oriC* regions were highly similar, with intergenic sequences located  
530 upstream and downstream of the *dnaA* gene containing 7 and one predicted DnaA boxes,  
531 respectively. Interestingly, upstream of the *dnaA* gene, one DnaA box perfectly matched the  
532 optimal consensus TTATCCACA in all *M. feriruminatoris* strains, whereas only imperfect DnaA  
533 boxes were predicted in *M. mycoides*-cluster species. Downstream of the *dnaA* gene, one perfect  
534 DnaA box was found in *M. feriruminatoris* and in all other strains from the *M. mycoides* cluster.  
535 This remarkable feature suggests that the replication initiation process might be accelerated by

536 enhanced binding of DnaA to the *M. feriruminatoris* *oriC* region. Further experiments based on  
537 DnaA box mutagenesis will be necessary to test this hypothesis.

538

539 In conclusion, this comparative genomics study confirmed the genomic boundaries of the *M.*  
540 *feriruminatoris* species. *M. feriruminatoris* has a closed pan-genome extrapolated from strains  
541 collected in different localizations over a 30-year period. The intraspecies variability is limited and  
542 mainly due to mobile elements such as IS, MICEs, and even a plasmid detected in one isolate only.  
543 The *M. feriruminatoris* species is very closely related to the *M. mycoides* cluster, as demonstrated  
544 by its phylogenetic positioning but also by its gene content and genome organization as well as  
545 several typical characteristics (plasmid, lipoprotein repertoire, production of galactan and glucan,  
546 etc.). Therefore, we propose to extend the perimeter of the *M. mycoides* cluster to include the  
547 *M. feriruminatoris* species. The evolution of *M. feriruminatoris* is associated with both losses and  
548 gains of genes, but further studies will be necessary to determine if these could explain the host  
549 specificity of *M. feriruminatoris* to wild *Caprinae*. Indeed, no spillover to domesticated ruminants  
550 has been detected so far. Finally, yet importantly, further work is needed to assess whether the  
551 specific organization and structure of the DnaA boxes around the *oriC* of the *M. feriruminatoris*  
552 genomes could explain its growth characteristics. The recent development of highly efficient in-  
553 yeast genome engineering methods and genome transplantation protocols for *M. feriruminatoris*  
554 (Talenton et al., 2022) now opens up ways to tackle the questions raised by our study.

555

## 556 **Acknowledgments**

557 The authors thank Pamela Nicholson for her technical help. We thank the team of the Centre de  
558 Calcul Scientifique at the Université de Sherbrooke for their valuable technical assistance. Access  
559 to computational resources was provided in part by Calcul Québec (<http://www.calculquebec.ca>)  
560 and Compute Canada (<http://www.computecanada.ca>). We also acknowledge important input  
561 from the Vigimyc network, which made it possible to collect most of the French isolates and Alain  
562 Blanchard for fruitful discussions on the manuscript. This research was supported by the  
563 International Development Research Centre (Grant No. 108625, <https://www.idrc.ca>).

564

565

566 **References**

- 567 Adachi, J., Waddell, P. J., Martin, W., and Hasegawa, M. (2000). Plastid genome phylogeny and a  
568 model of amino acid substitution for proteins encoded by chloroplast DNA. *J. Mol. Evol.* 50,  
569 348–358. doi:10.1007/s002399910038.
- 570 Ambroset, C., Pau-Roblot, C., Game, Y., Gaurivaud, P., and Tardy, F. (2017). Identification and  
571 characterization of *Mycoplasma feriruminatoris* sp. nov. strains isolated from Alpine ibex: A  
572 4th species in the *Mycoplasma mycoides* cluster hosted by non-domesticated ruminants?  
573 *Front. Microbiol.* 8, 939. doi:10.3389/fmicb.2017.00939.
- 574 Arfi, Y., Minder, L., Di Primo, C., Le Roy, A., Ebel, C., Coquet, L., et al. (2016). MIB–MIP is a  
575 mycoplasma system that captures and cleaves immunoglobulin G. *Proc. Natl. Acad. Sci. U. S.*  
576 *A.* 113, 5406–5411. doi:10.1073/pnas.1600546113.
- 577 Bailey, T. L., Boden, M., Buske, F. A., Frith, M., Grant, C. E., Clementi, L., et al. (2009). MEME Suite:  
578 Tools for motif discovery and searching. *Nucleic Acids Res.* 37, 202–208.  
579 doi:10.1093/nar/gkp335.
- 580 Bertin, C., Pau-Roblot, C., Courtois, J., Manso-Silvan, L., Tardy, F., Poumarat, F., et al. (2015). Highly  
581 dynamic genomic loci drive the synthesis of two types of capsular or secreted  
582 polysaccharides within the *Mycoplasma mycoides* cluster. *Appl. Environ. Microbiol.* 81, 676–  
583 687. doi:10.1128/AEM.02892-14.
- 584 Bischof, D. F., Vilei, E. M., and Frey, J. (2006). Genomic differences between type strain PG1 and  
585 field strains of *Mycoplasma mycoides* subsp. *mycoides* small-colony type. *Genomics* 88, 633–  
586 641. doi:10.1016/j.ygeno.2006.06.018.

- 587 Bolger, A. M., Lohse, M., and Usadel, B. (2014). Trimmomatic: A flexible trimmer for Illumina  
588 sequence data. *Bioinformatics* 30, 2114–2120. doi:10.1093/bioinformatics/btu170.
- 589 Breton, M., Tardy, F., Dordet-Frisoni, E., Sagne, E., Mick, V., Renaudin, J., et al. (2012). Distribution  
590 and diversity of mycoplasma plasmids: lessons from cryptic genetic elements. *BMC*  
591 *Microbiol.* 12, 257. doi:10.1186/1471-2180-12-257.
- 592 Brown, D. R., May, M., Bradbury, J. M., Balish, M. F., Calcutt, M. J., Glass, J. I., et al. (2018).  
593 “*Mycoplasma*,” in *Bergey’s Manual of Systematics of Archaea and Bacteria*. Wiley online  
594 library, doi:10.1002/9781118960608.gbm01263.pub2.
- 595 Brown, D. R., May, M., Bradbury, J. M., and Johansson, K.-E. (2018). “*Mollicutes*,” in *Bergey’s*  
596 *Manual of systematics of Archaea and Bacteria*, Wiley Online library,  
597 doi:10.1002/9781118960608.cbm00048.pub2.
- 598 Brown, D. R., Whitcomb, R. F., and Bradbury, J. M. (2007). Revised minimal standards for  
599 description of new species of the class *Mollicutes* (division *Tenericutes*). *Int. J. Syst. Evol.*  
600 *Microbiol.* 57, 2703–2719. doi:10.1099/ijs.0.64722-0.
- 601 Chen, W. P., and Kuo, T. (1993). A simple and rapid method for the preparation of gram-negative  
602 bacterial genomic DNA. *Nucleic Acids Res.* 21, 2260. doi:10.1093/nar/21.9.2260.
- 603 Citti, C., Dordet-Frisoni, E., Nouvel, L. X., Kuo, C. H., and Baranowski, E. (2018). Horizontal gene  
604 transfers in *Mycoplasmas* (*Mollicutes*). *Curr. Issues Mol. Biol.* 29, 3–22.  
605 doi:10.21775/cimb.029.003.
- 606 Contreras-Moreira, B., and Vinuesa, P. (2013). GET\_HOMOLOGUES, a versatile software package



- 607 for scalable and robust microbial pangenome analysis. *Appl. Environ. Microbiol.* 79, 7696–  
608 7701. doi:10.1128/AEM.02411-13.
- 609 Cottew, G. S., Breard, A., DaMassa, A. J., Erno, H., Leach, R. H., Lefevre, P. C., et al. (1987).  
610 Taxonomy of the *Mycoplasma mycoides* cluster. *Isr. J. Med. Sci.* 23, 632–635.
- 611 Csurös, M. (2010). Count: Evolutionary analysis of phylogenetic profiles with parsimony and  
612 likelihood. *Bioinformatics* 26, 1910–1912. doi:10.1093/bioinformatics/btq315.
- 613 Darling, A. C. E., Mau, B., Blattner, F. R., and Perna, N. T. (2004). Mauve: multiple alignment of  
614 conserved genomic sequence with rearrangements. *Genome Res.* 14, 1394–1403.  
615 doi:10.1101/gr.2289704.tion.
- 616 Darling, A. E., Mau, B., and Perna, N. T. (2010). Progressivemauve: Multiple genome alignment  
617 with gene gain, loss and rearrangement. *PLoS One* 5. doi:10.1371/journal.pone.0011147.
- 618 Darriba, D., Taboada, G. L., Doallo, R., and Posada, D. (2011). ProtTest 3: Fast selection of best-fit  
619 models of protein evolution. *Bioinformatics* 27, 1164–165. doi:10.1007/978-3-642-21878-  
620 1\_22.
- 621 Fischer, A., Santana-Cruz, I., Giglio, M., Nadendla, S., Drabek, E., Vilei, E. M., et al. (2013). Genome  
622 sequence of *Mycoplasma ferriruminatoris* sp. nov., a fast-growing *Mycoplasma* species.  
623 *Genome Announc.* 1, :e00216-12. doi:10.1128/genomeA.00216-12.
- 624 Fischer, A., Shapiro, B., Muriuki, C., Heller, M., Schnee, C., Bongcam-Rudloff, E., et al. (2012). The  
625 origin of the “mycoplasma mycoides cluster” coincides with domestication of ruminants.  
626 *PLoS One* 7, 3–8. doi:10.1371/journal.pone.0036150.

- 627 Gasparich, G. E., Whitcomb, R. F., Dodge, D., French, F. E., Glass, J., and Williamson, D. L. (2004).  
628 The genus *Spiroplasma* and its non-helical descendants: Phylogenetic classification,  
629 correlation with phenotype and roots of the *Mycoplasma mycoides* clade. *Int. J. Syst. Evol.*  
630 *Microbiol.* 54, 893–918. doi:10.1099/ijs.0.02688-0.
- 631 Gaurivaud, P., Baranowski, E., Pau-Roblot, C., Sagné, E., Citti, C., and Tardy, F. (2016). *Mycoplasma*  
632 *agalactiae* secretion of beta-(1-6)-glucan, a rare polysaccharide in prokaryotes, is governed  
633 by high-frequency phase variation. *Appl. Environ. Microbiol.* 82, 3370–3383.  
634 doi:10.1128/AEM.00274-16.
- 635 Gaurivaud, P., Lakhdar, L., Le Grand, D., Poumarat, F., and Tardy, F. (2014). Comparison of in vivo  
636 and in vitro properties of capsulated and noncapsulated variants of *Mycoplasma mycoides*  
637 subsp. *mycoides* strain Afadé: A potential new insight into the biology of contagious bovine  
638 pleuropneumonia. *FEMS Microbiol. Lett.* 359, 42–49. doi:10.1111/1574-6968.12579.
- 639 Gourgues, G., Barré, A., Beaudoin, E., Weber, J., Magdelenat, G., Barbe, V., et al. (2016).  
640 Complete genome sequence of *Mycoplasma mycoides* subsp. *mycoides* T1/44, a vaccine  
641 strain against contagious bovine pleuropneumonia. *Genome Announc.* 4, e00263-16.  
642 doi:10.1128/genomeA.00263-16.
- 643 Hallgren, J., Tsigiros, K. D., Damgaard Pedersen, M., Juan, J., Armenteros, A., Marcatili, P., et al.  
644 (2022). DeepTMHMM predicts alpha and beta transmembrane proteins using deep neural  
645 networks. *bioRxiv*, 2022.04.08.487609. Available at:  
646 <https://www.biorxiv.org/content/10.1101/2022.04.08.487609v1>.
- 647 Hill, V., Akarsu, H., Barbarroja, R. S., Cippà, V. L., Kuhnert, P., Heller, M., et al. (2021). *Minimalistic*

648 *mycoplasmas harbor different functional toxin-antitoxin systems. PloS Genet.* 17(10).

649 doi:10.1371/journal.pgen.1009365.

650 Hutchison III, C. A., Chuang, R.-Y., Noskov, V. N., Assad-Garcia, N., Deerinck, T. J., Ellisman, M. H.,

651 et al. (2016). Design and synthesis of a minimal bacterial genome. *Science* 351, 1414–1426.

652 doi:10.1126/science.aad6253.

653 Jores, J., Baldwin, C., Blanchard, A., Browning, G. F., Colston, A., Gerdt, V., et al. (2020).

654 Contagious bovine and caprine pleuropneumonia: a research community's

655 recommendations for the development of better vaccines. *npj Vaccines* 5.

656 doi:10.1038/s41541-020-00214-2.

657 Jores, J., Fischer, A., Sirand-Pugnet, P., Thomann, A., Liebler-Tenorio, E. M., Schnee, C., et al.

658 (2013). *Mycoplasma feriruminatoris* sp. nov., a fast growing *Mycoplasma* species isolated

659 from wild *Caprinae*. *Syst. Appl. Microbiol.* 36, 533–538. doi:10.1016/j.syapm.2013.07.005.

660 Jores, J., Ma, L., Ssajjakambwe, P., Schieck, E., Liljander, A. M., Chandran, S., et al. (2019). Removal

661 of a subset of non-essential genes fully attenuates a highly virulent *Mycoplasma* strain. *Front.*

662 *Microbiol.* 10, 508978. doi:10.1101/508978.

663 Jores, J., Schieck, E., Liljander, A., Sacchini, F., Posthaus, H., Lartigue, C., et al. (2019). In vivo role

664 of capsular polysaccharide in *Mycoplasma mycoides*. *J. Infect. Dis.* 219, 1559–1563.

665 doi:10.1093/infdis/jiy713.

666 Kamminga, T., Koehorst, J. J., Vermeij, P., Slagman, S.-J., Martins dos Santos, V. A. P., Bijlsma, J. J.

667 E., et al. (2017). Persistence of functional protein domains in *Mycoplasma* species and their

668 role in host specificity and synthetic minimal life. *Front. Cell. Infect. Microbiol.* 7, 1–13.

669        doi:10.3389/fcimb.2017.00031.

670    Koren, S., Walenz, B. P., Berlin, K., Miller, J. R., Bergman, N. H., Phillippy, A. M., et al. (2017). Canu:  
671        scalable and accurate long-read assembly via adaptive k-mer weighting and repeat  
672        separation. *Genome Res.* 27, 722–736. doi:10.1101/gr.215087.116.

673    Kristensen, D. M., Kannan, L., Coleman, M. K., Wolf, Y. I., Sorokin, A., Koonin, E. V., et al. (2010).  
674        A low-polynomial algorithm for assembling clusters of orthologous groups from  
675        intergenomic symmetric best matches. *Bioinformatics* 26, 1481–1487.  
676        doi:10.1093/bioinformatics/btq229.

677    Lartigue, C., Glass, J. I., Alperovich, N., Pieper, R., Parmar, P. P., Hutchison III, C. A., et al. (2007).  
678        Genome transplantation in bacteria: changing one species to another. *Science* 317, 632–638.  
679        doi:10.1126/science.1144622.

680    Li, H., and Durbin, R. (2009). Fast and accurate short read alignment with Burrows-Wheeler  
681        transform. *Bioinformatics* 25, 1754–1760. doi:10.1093/bioinformatics/btp324.

682    Li, H., Handsaker, B., Wysoker, A., Fennell, T., Ruan, J., Homer, N., et al. (2009). The Sequence  
683        Alignment/Map format and SAMtools. *Bioinformatics* 25, 2078–2079.  
684        doi:10.1093/bioinformatics/btp352.

685    Lo, W.-S., Gasparich, G. E., and Kuo, C. H. (2018). Convergent evolution among ruminant-  
686        pathogenic *Mycoplasma* involved extensive gene content changes. *Genome Biol. Evol.* 10,  
687        2130–2139. doi:10.1093/gbe/evy172/5068192.

688    Manso-Silván, L., Perrier, X., and Thiaucourt, F. (2007). Phylogeny of the *Mycoplasma mycoides*

689 cluster based on analysis of five conserved protein-coding sequences and possible  
690 implications for the taxonomy of the group. *Int. J. Syst. Evol. Microbiol.* 57, 2247–2258.  
691 doi:10.1099/ijs.0.64918-0.

692 Manso-Silván, L., Vilei, E. M., Sachse, K., Djordjevic, S. P., Thiaucourt, F., and Frey, J. (2009).  
693 *Mycoplasma leachii* sp. nov. as a new species designation for *Mycoplasma* sp. bovine group  
694 7 of Leach, and reclassification of *Mycoplasma mycoides* subsp. *mycoides* LC as a serovar of  
695 *Mycoplasma mycoides* subsp. *capri*. *Int. J. Syst. Evol. Microbiol.* 59, 1353–1358.  
696 doi:10.1099/ijs.0.005546-0.

697 March, J. B., Clark, J., and Brodlie, M. (2000). Characterization of strains of *Mycoplasma mycoides*  
698 subsp. *mycoides* small colony type isolated from recent outbreaks of contagious bovine  
699 pleuropneumonia in Botswana and Tanzania: Evidence for a new biotype. *J. Clin. Microbiol.*  
700 38, 1419–1425. doi:10.1128/jcm.38.4.1419-1425.2000.

701 Marchler-Bauer, A., and Bryant, S. H. (2004). CD-Search: Protein domain annotations on the fly.  
702 *Nucleic Acids Res.* 32, 327–331. doi:10.1093/nar/gkh454.

703 McKenna, A., Hanna, M., Banks, E., Sivachenko, A., Cibulskis, K., Kernytsky, A., et al. (2010). The  
704 Genome Analysis Toolkit: A MapReduce framework for analyzing next-generation DNA  
705 sequencing data. *Genome Res.* 20, 1297–1303.

706 Moldovan, M. A., and Gelfand, M. S. (2018). Pangenomic definition of prokaryotic species and the  
707 phylogenetic structure of *Prochlorococcus* spp. *Front. Microbiol.* 9, 1–11.  
708 doi:10.3389/fmicb.2018.00428.

709 Moscoso, M., Del Solar, G., and Espinosa, M. (1995). Specific nicking-closing activity of the initiator

- 710 of replication protein RepB of plasmid pMV158 on supercoiled or single-stranded DNA. *J.*  
711 *Biol. Chem.* 270, 3772–3779. doi:10.1074/jbc.270.8.3772.
- 712 Noll, L. W., Highland, M. A., Hamill, V. A., Tsui, W. N. T., Porter, E. P., Lu, N., et al. (2022).  
713 Development of a real-time PCR assay for detection and differentiation of *Mycoplasma*  
714 *ovipneumoniae* and a novel respiratory-associated *Mycoplasma* species in domestic sheep  
715 and goats. *Transbound. Emerg. Dis.*, 1–9. Available at: <https://doi.org/10.1111/tbed.14477>.
- 716 Pendorf, K., Tsuyoshi, H., Osana, Y., and Sakakibara, Y. (2010). Murasaki: A fast, parallelizable  
717 algorithm to find anchors from multiple genomes. *PLoS One* 5.  
718 doi:10.1371/journal.pone.0012651.
- 719 Poumarat, F., Jarrige, N., and Tardy, F. (2014). Purpose and overview of results of the Vigimyc  
720 Network for the epidemiological surveillance of mycoplasmoses in ruminants in France.  
721 *Euroreference* 12, 22–27. doi:10.2307/j.ctt1r33pzt.6.
- 722 Poumarat, F., Lonchambon, D., and Martel, J. L. (1992). Application of dot immunobinding on  
723 membrane filtration (MF dot) to the study of relationships within “*M. mycoides* cluster” and  
724 within “glucose and arginine-negative cluster” of ruminant mycoplasmas. *Vet. Microbiol.* 32,  
725 375–390.
- 726 Röske, K., Foecking, M. F., Yooseph, S., Glass, J. I., Calcutt, M. J., and Wise, K. S. (2010). A versatile  
727 palindromic amphipathic repeat coding sequence horizontally distributed among diverse  
728 bacterial and eucaryotic microbes. *BMC Genomics* 11. doi:10.1186/1471-2164-11-430.
- 729 Schieck, E., Lartigue, C., Frey, J., Voza, N., Hegermann, J., Miller, R. A., et al. (2016).  
730 Galactofuranose in *Mycoplasma mycoides* is important for membrane integrity and conceals

- 731 adhesins but does not contribute to serum resistance. *Mol. Microbiol.* 99, 55–70.  
732 doi:10.1111/mmi.13213.
- 733 Schumacher, M., Nicholson, V. P., Stoffel, M. H., Chandran, S., D’Mello, A., Ma, L., et al. (2019).  
734 Evidence for the cytoplasmic localization of the L- $\alpha$ -glycerophosphate oxidase in members  
735 of the “*Mycoplasma mycoides* Cluster”. *Front. Microbiol.* 10, 1–13.  
736 doi:10.3389/fmicb.2019.01344.
- 737 Seemann, T. (2014). Prokka: Rapid prokaryotic genome annotation. *Bioinformatics* 30, 2068–  
738 2069. doi:10.1093/bioinformatics/btu153.
- 739 Seto, S., Murata, S. and Miyata M. (1997) Characterization of *dnaA* gene expression in  
740 *Mycoplasma capricolum*. *FEMS Microbiol. Lett.*, 150, 239–247. doi:10.1016/s0378-  
741 1097(97)00121-3.
- 742 Sievers, F., Wilm, A., Dineen, D., Gibson, T. J., Karplus, K., Li, W., et al. (2011). Fast, scalable  
743 generation of high-quality protein multiple sequence alignments using Clustal Omega. *Mol.*  
744 *Syst. Biol.* 7, 539. doi:10.1038/msb.2011.75.
- 745 Siguier, P., Perochon, J., Lestrade, L., Mahillon, J., and Chandler, M. (2006). ISfinder: the reference  
746 centre for bacterial insertion sequences. *Nucleic Acids Res.* 34, 32–36.  
747 doi:10.1093/nar/gkj014.
- 748 Sirand-Pugnet, P., Lartigue, C., Marendá, M., Jacob, D., Barré, A., Barbe, V., et al. (2007). Being  
749 pathogenic, plastic, and sexual while living with a nearly minimal bacterial genome. *PLoS*  
750 *Genet.* 3, 744–758. doi:10.1371/journal.pgen.0030075.

- 751 Spersger, J., DeSoye, P., Ruppitsch, W., Cabal Rosel, A., Dinhopf, N., Szostak, M. P., et al. (2022).  
752 *Mycoplasma tauri* sp. nov. isolated from the bovine genital tract. *Syst. Appl. Microbiol.* 45,  
753 126292. doi:10.1016/j.syapm.2021.126292.
- 754 Stamatakis, A. (2014). RAxML version 8: A tool for phylogenetic analysis and post-analysis of large  
755 phylogenies. *Bioinformatics* 30, 1312–1313. doi:10.1093/bioinformatics/btu033.
- 756 Szczepanek, S. M., Boccaccio, M., Pflaum, K., Liao, X., and Geary, S. J. (2014). Hydrogen peroxide  
757 production from glycerol metabolism is dispensable for virulence of *Mycoplasma*  
758 *gallisepticum* in the tracheas of chickens. *Infect. Immun.* 82, 4915–4920.  
759 doi:10.1128/IAI.02208-14.
- 760 Talavera, G., and Castresana, J. (2007). Improvement of phylogenies after removing divergent and  
761 ambiguously aligned blocks from protein sequence alignments. *Syst. Biol.* 56, 564–577.  
762 doi:10.1080/10635150701472164.
- 763 Talenton, V., Baby, V., Gourgues, G., Mouden, C., Claverol, S., Vashee, S., et al. (2022). Genome  
764 engineering of the fast growing *Mycoplasma feriruminatoris*, towards a functional chassis  
765 for veterinary vaccines. *ACS Synth. Biol.* 11, 1919–1930.
- 766 Tardy, F., Baranowski, E., Nouvel, L. X., Mick, V., Manso-Silva'n, L., Thiaucourt, F., et al. (2012).  
767 Emergence of atypical *Mycoplasma agalactiae* strains harboring a new prophage and  
768 associated with an alpine wild ungulate mortality episode. *Appl. Environ. Microbiol.* 78,  
769 4659–4668. doi:10.1128/AEM.00332-12.
- 770 Tardy, F., Maigre, L., Poumarat, F., and Citti, C. (2009). Identification and distribution of genetic  
771 markers in three closely related taxa of the *Mycoplasma mycoides* cluster: Refining the



- 772 relative position and boundaries of the *Mycoplasma* sp. bovine group 7 taxon (*Mycoplasma*  
773 *leachii*). *Microbiology* 155, 3775–3787. doi:10.1099/mic.0.030528-0.
- 774 Tettelin, H., Massignani, V., Cieslewicz, M. J., Donati, C., Medini, D., Ward, N. L., et al. (2005).  
775 Genome analysis of multiple pathogenic isolates of *Streptococcus agalactiae*: implications  
776 for the microbial “pan-genome”. *Proc. Natl. Acad. Sci. U. S. A.* 102, 13950–5.  
777 doi:10.1073/pnas.0506758102.
- 778 Teufel, F., Almagro Armenteros, J. J., Johansen, A. R., Gíslason, M. H., Pihl, S. I., Tsirigos, K. D., et  
779 al. (2022). SignalP 6.0 predicts all five types of signal peptides using protein language models.  
780 *Nat. Biotechnol.* 40, 1023–1025. doi:10.1038/s41587-021-01156-3.
- 781 Thiaucourt, F., Manso-Silvan, L., Salah, W., Barbe, V., Vacherie, B., Jacob, D., et al. (2011).  
782 *Mycoplasma mycoides*, from “mycoides Small Colony” to “capri”. A microevolutionary  
783 perspective. *BMC Genomics* 12, 114.
- 784 Vilei, E. M., and Frey, J. (2001). Genetic and biochemical characterization of glycerol uptake in  
785 *Mycoplama mycoides* subsp. *mycoides* SC: its impact on H2O2 production and virulence. *Clin.*  
786 *Diagn. Lab. Immunol.* 8, 85–92. doi:10.1128/CDLI.8.1.85.
- 787 Volokhov, D. V., Furtak, V. A., Blom, J., Zagorodnyaya, T. A., Gao, Y., and Gulland, F. M. (2022).  
788 *Mycoplasma miroungirhinis* sp. nov. and *Mycoplasma miroungigenitalium* sp. nov., isolated  
789 from northern elephant seals (*Mirounga angustirostris*), *Mycoplasma phocoenae* sp. nov.,  
790 isolated from harbour porpoise (*Phocoena phocoena*), and *Mycoplasma phocoeninasale* sp.  
791 nov., isolated from harbour porpoise and California sea lions (*Zalophus californianus*). *Int. J.*  
792 *Syst. Evol. Microbiol.* 72. doi:10.1099/ijsem.0.005224.

793 Walker, B. J., Abeel, T., Shea, T., Priest, M., Abouelliel, A., Sakthikumar, S., et al. (2014). Pilon: An  
794 integrated tool for comprehensive microbial variant detection and genome assembly  
795 improvement. *PLoS One* 9. doi:10.1371/journal.pone.0112963.

796 Westberg, J., Persson, A., Holmberg, A., Goesmann, A., Lundeberg, J., Johansson, K., et al. (2004).  
797 The genome sequence of *Mycoplasma mycoides* subsp . *mycoides* SC type strain PG1T, the  
798 causative agent of contagious bovine pleuropneumonia (CBPP). *Genome Res.* 14, 221–227.  
799 doi:10.1101/gr.1673304.

800 Willenbrock, H., Hallin, P. F., Wassenaar, T. M., and Ussery, D. W. (2007). Characterization of  
801 probiotic *Escherichia coli* isolates with a novel pan-genome microarray. *Genome Biol.* 8,  
802 R267. doi:10.1186/gb-2007-8-12-r267.

803

804

| Strain name        | Host                | Year isolated | Location of isolation                      | Main clinical sign                      | Genome size (bp) | Genes | CDS | IS3 | MICE | Plasmid | Accession no. |
|--------------------|---------------------|---------------|--------------------------------------------|-----------------------------------------|------------------|-------|-----|-----|------|---------|---------------|
| 8756-13            | Rocky Mountain goat | 1987          | USA                                        | -                                       | 1 060 955        | 919   | 882 | 13  | -    | -       | LR739235      |
| G5847 <sup>T</sup> | Ibex                | 1993          | Berlin Zoo, Germany                        | arthritis                               | 1 075 604        | 916   | 878 | 12  | -    | -       | CP091032.1    |
| G5813/1+2          | Ibex                | 1993          | Berlin Zoo, Germany                        | arthritis                               | 1 037 206        | 919   | 882 | 14  | -    | -       | LR738858      |
| G1650              | Ibex                | 1993          | Berlin Zoo, Germany                        | arthritis                               | 1 038 690        | 913   | 876 | 14  | -    | -       | LR739234      |
| G1705              | Ibex                | 1993          | Berlin Zoo, Germany                        | arthritis                               | 1 038 707        | 915   | 878 | 14  | -    | -       | LR739233      |
| L13461             | Ibex                | 2003          | Savoie region, French Alps                 | septicemia                              | 1 017 763        | 900   | 863 | 12  | -    | -       | CP113496      |
| L14822             | Ibex                | 2007          | Savoie region, French Alps                 | pneumonia                               | 1 084 342        | 909   | 872 | 3   | 2    | -       | CP104008      |
| L14815             | Ibex                | 2007          | Savoie region, French Alps                 | keratoconjunctivitis                    | 1 021 626        | 863   | 826 | 2   | -    | -       | CP113497      |
| L15181             | Ibex                | 2008          | Savoie region, French Alps                 | keratoconjunctivitis                    | 1 042 812        | 886   | 849 | 3   | 1    | -       | CP113498      |
| L15220             | Ibex                | 2009          | Savoie region, French Alps                 | pneumonia                               | 1 016 817        | 858   | 821 | 2   | 1    | 1*      | CP104009      |
| L15407             | Ibex                | 2010          | Savoie region, French Alps                 | pneumonia, keratoconjunctivitis         | 1 025 568        | 966   | 929 | 2   | -    | -       | CP113499      |
| L15568             | Ibex                | 2011          | Savoie region, French Alps                 | none (animal follow-up)                 | 1 015 346        | 950   | 913 | 1   | -    | -       | CP113500      |
| 14/OD_0492         | Ibex                | 2014          | Nature and Animal Park Goldau, Switzerland | liver, fibrinous polyarthritis          | 1 070 562        | 941   | 904 | 0   | 1    | -       | LR739237      |
| F11561             | Ibex                | 2017          | Haute-Savoie region, French Alps           | Unknown (animal found dead in the wild) | 1 011 470        | 854   | 817 | 1   | -    | -       | CP113495      |

**Table 1.** *M. feriruminatoris* strains used in this study

\* Plasmid accession number: CP104010
